# Supplementary material
Source: publisher figshare collection journal article supplement (https://geolsoc.figshare.com/ndownloader/files/13459598)
Supplement: Supplementary file 1 [file 13459598]

## Sheet: samples
Sample ID		MON-Md	MON-SD	PRE-Md	BG-CG	BG-92	PG-A	PG-B
sample location		Monzoni	Monzoni	Predazzo	Bagolino	Baglino	below Punta Grohmann	below Punta Grohmann
GPS coordinates		46°23'5.40"N	46°23'27.2"N	46°19'52.90"N	45°49'7.68"N	45°49'5.98"N	46°30'13.00"N	46°30'13.00"N
		11°43'52.50"E	11°45'01.9"E	11°36'14.30"E	10°28'5.62"E	10°28'11.33"E	11°44'32.60"E	11°44'32.60"E
rock type		monzodiorite	qtz-syenite	monzodiorite	bentonite	bentonite	bentonite	bentonite
SiO2	wt.%	54.2491	61.145	50.5906
TiO2	wt.%	0.871308	0.291027	0.66999
Al2O3	wt.%	17.0315	18.2312	19.9408
Fe2O3	wt.%	7.85559	2.89269	8.5135
FeO	wt.%	0	0	0
MnO	wt.%	0.188471	0.0136724	0.160837
MgO	wt.%	3.01159	0.328138	2.75396
CaO	wt.%	7.35136	2.79796	9.00194
Na2O	wt.%	3.86612	8.11068	2.90691
K2O	wt.%	3.08757	3.07434	2.78751
P2O5	wt.%	0.370035	0.128911	0.640388
Cr2O3	wt.%	0	0	0
NiO	wt.%	0.00145657	0.000969338	0.000326464
H2O	wt.%	0	0	0
CO2	wt.%	0	0	0
LOI	wt.%	1.31344	2.32434	1.31752
Total		99.1975	99.339	99.2843
Traces
Rb	ppm	105.6	58	93.9
Ba	ppm	458.5	116.1	435.3
Sr	ppm	844.7	266.4	1248.7
Nb	ppm	14.7	24.9	7.1
Zr	ppm	170.6	337.3	117.8
Hf	ppm	8.7	10.1	4.3
Y	ppm	30.9	29.8	26.8
Ga	ppm	22.9	19.5	22
Zn	ppm	80	9.5	98.3
Cu	ppm	12.5	4.9	72.8
Ni	ppm	11.6	7.8	2.6
Co	ppm	24.5	4.9	30.2
Cr	ppm	0	0	0
V	ppm	167.4	27	154.2
Sc	ppm	14.8	3.2	12.9
La	ppm	24.5	55.4	26.5
Ce	ppm	56.2	113.6	74.7
Nd	ppm	30.3	36	36.3
Pb	ppm	74.2	4.4	17.8
Th	ppm	46.8	32.6	12.5
U	ppm	0	5.7	0.3
W	ppm	0.2	2.3	0.2
